# Supplementary material for: Analogs of the Heat Shock Protein 70 Inhibitor MKT-077 Suppress Medullary Thyroid Carcinoma Cells
Source: MDPI journal article supplement (doi:10.3390/ijms23031063), 2022-01-19
Supplement: s1 [file s1]

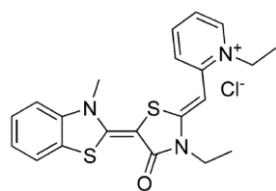

**MKT-077**

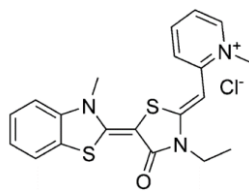

**YM-01**

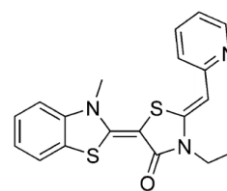

**YM-08**

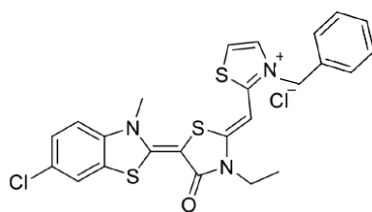

**JG98**

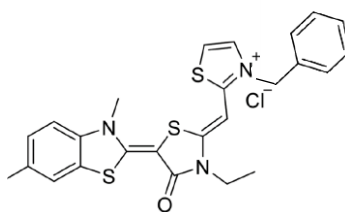

**JG194**

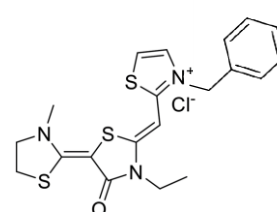

**JG258**

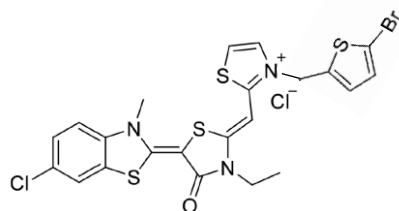

**JG231**

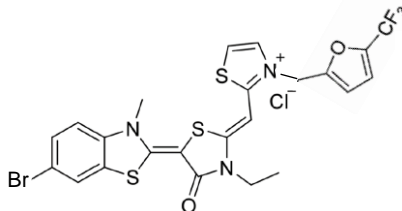

**JG294**

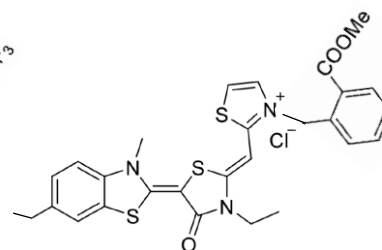

**JG345**

**Figure S1.** Chemical structures of MKT-077 derivatives used in this study

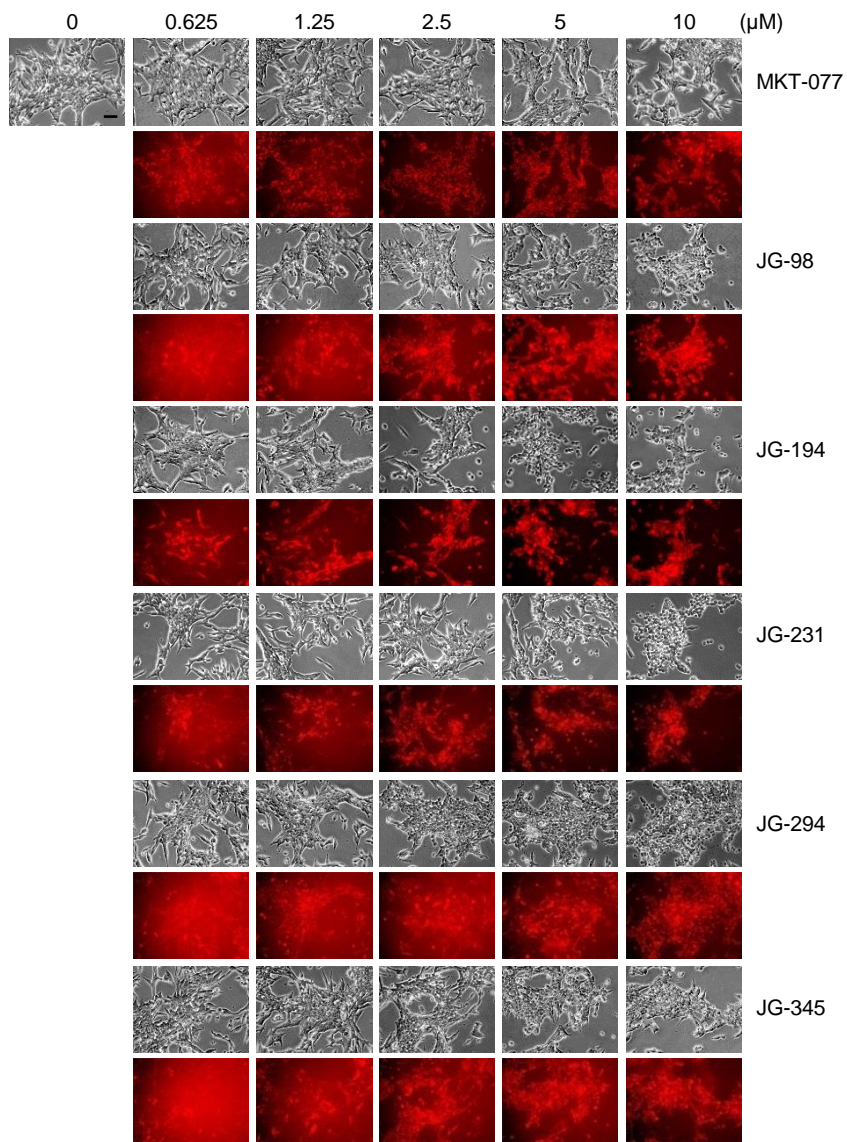

**Figure S2.** Images under a fluorescent microscope (scale bar = 100  $\mu$ m) of TT cells treated with the indicated chemical compounds for 24 hour.
